# Supplementary material
Source: PubMed Central journal article supplement (PMC7274281)
Supplement: CJN.12541019SupplementaryData.pdf [file CJN.12541019SupplementaryData.pdf]

## Supplemental Material Table of Contents

**Supplemental Table 1:** Characteristics of adult kidney failure patients, stratified by race, at time of initial transplant clinic visit

**Supplemental Table 2: Difference for inactive time on waitlist with standard deviation**

**Supplemental Table 3:** Sensitivity analyses testing of mediation of SES and comorbidity on listing for kidney transplant within one year between black versus white kidney failure patients or receipt of kidney transplant between black versus white kidney transplant candidates on the waitlist using inverse odds ratio weighting.

**Supplemental Table 4: Stratified analysis testing mediation of SES and comorbidity on listing for kidney transplant within one year between black and white kidney failure patients using inverse odds ratio weighting.**

**Supplemental Table 1:** Characteristics of adult kidney failure patients, stratified by race, at time of initial transplant clinic visit

|                                           |                               | White (n=1,561) | Black (n=1,452) |
|-------------------------------------------|-------------------------------|-----------------|-----------------|
| <i>Demographics</i>                       |                               |                 |                 |
| Age, mean years (SD)                      |                               | 567 (13)        | 53 (13)         |
| Sex, N (%)                                | Male                          | 950 (61)        | 824 (57)        |
|                                           | Female                        | 611 (39)        | 628 (43)        |
| Center, N (%)                             | Johns Hopkins                 | 1,352 (87)      | 1,385 (95)      |
|                                           | University of Michigan        | 209 (13)        | 67 (5)          |
| Dialysis modality, N (%)                  | Hemodialysis                  | 654 (42)        | 920 (64)        |
|                                           | Peritoneal dialysis           | 175 (11)        | 162 (11)        |
|                                           | None (pre-emptive transplant) | 717 (46)        | 357 (25)        |
| Time on dialysis, mean years (SD)*        |                               | 2.1 (2.7)       | 2.6 (3.0)       |
| <i>Socioeconomic Status (SES)</i>         |                               |                 |                 |
| Highest Level Education Attained, N (%)   | Grade School                  | 44 (3)          | 129 (9)         |
|                                           | High School                   | 529 (34)        | 605 (42)        |
|                                           | Two-year technical degree     | 140 (9)         | 115 (8)         |
|                                           | College                       | 530 (34)        | 394 (27)        |
|                                           | Graduate School               | 312 (20)        | 201 (14)        |
|                                           | Declined to answer            | 2 (0.1)         | 6 (0.4)         |
| Annual Income, N (%)                      | < \$50,000                    | 405 (26)        | 502 (35)        |
|                                           | \$50,000 – 100,000            | 379 (24)        | 268 (19)        |
|                                           | ≥ \$100,000                   | 401 (26)        | 202 (13)        |
|                                           | Declined to answer            | 376 (24)        | 480 (33)        |
| Employment status, N (%)                  | Not employed                  | 926 (59)        | 974 (67)        |
|                                           | Employed                      | 629 (40)        | 473 (33)        |
|                                           | Declined to answer            | 6 (0.4)         | 5 (0.3)         |
| <i>Comorbidities</i>                      |                               |                 |                 |
| BMI in kg/m <sup>2</sup> , mean (SD)      |                               | 29 (6)          | 29.5 (6.4)      |
| Obese (BMI ≥30 kg/m <sup>2</sup> ), N (%) | No                            | 948 (61)        | 809 (56)        |
|                                           | Yes                           | 602 (39)        | 630 (43)        |
|                                           | Unavailable                   | 11 (0.7)        | 13 (0.9)        |
| Tobacco Use, N (%)                        | Never                         | 995 (65)        | 977 (67)        |
|                                           | Former                        | 458 (29)        | 330 (23)        |
|                                           | Current                       | 100 (6)         | 140 (10)        |
| History of myocardial infarction, N (%)   | No                            | 1,379 (88)      | 1,338 (92)      |
|                                           | Yes                           | 180 (12)        | 113 (8)         |
|                                           | Unavailable                   | 2 (0.1)         | 1 (0.1)         |
|                                           | No                            | 962 (62)        | 860 (59)        |

|                                            |             |             |             |
|--------------------------------------------|-------------|-------------|-------------|
| History of congestive heart failure, N (%) | Yes         | 122 (8)     | 187 (13)    |
|                                            | Unavailable | 477 (31)    | 405 (28)    |
| Diabetes, N (%)                            | No          | 932 (60)    | 791 (55)    |
|                                            | Yes         | 627 (40)    | 659 (45)    |
|                                            | Unavailable | 2 (0.1)     | 2 (0.1)     |
| Diabetes with complications, N (%)         | No          | 1161 (74)   | 1039 (72)   |
|                                            | Yes         | 400 (26)    | 413 (28)    |
|                                            | Unavailable | 0 (0)       | 0 (0)       |
| Peripheral vascular disease, N (%)         | No          | 1,447 (93)  | 1,365 (94)  |
|                                            | Yes         | 114 (7)     | 86 (6)      |
|                                            | Unavailable | 0 (0)       | 1 (0.1)     |
| Cerebral vascular disease, N (%)           | No          | 1,463 (94)  | 1,357 (94)  |
|                                            | Yes         | 96 (6)      | 91 (6)      |
|                                            | Unavailable | 2 (0.1)     | 4 (0.3)     |
| COPD, N (%)                                | No          | 1,447 (93)  | 1,369 (94)  |
|                                            | Yes         | 105 (7)     | 79 (5)      |
|                                            | Unavailable | 9 (0.6)     | 4 (0.3)     |
| Rheumatologic disease, N (%)               | No          | 1,467 (94)  | 1,332 (92)  |
|                                            | Yes         | 89 (6)      | 111 (8)     |
|                                            | Unavailable | 5 (0.3)     | 9 (0.6)     |
| Peptic ulcer disease, N (%)                | No          | 1,493 (96)  | 1,402 (97)  |
|                                            | Yes         | 62 (4)      | 44 (3)      |
|                                            | Unavailable | 6 (0.4)     | 6 (0.4)     |
| Liver disease (moderate-severe), N (%)     | No          | 1,511 (97)  | 1,389 (96)  |
|                                            | Yes         | 44 (3)      | 61 (4)      |
|                                            | Unavailable | 6 (0.4)     | 2 (0.1)     |
| HIV, N (%)                                 | No          | 1,554 (100) | 1,359 (94)  |
|                                            | Yes         | 7 (0.5)     | 91 (6)      |
|                                            | Unavailable | 0 (0)       | 2 (0.1)     |
| Dementia, N (%)                            | No          | 1,550 (99)  | 1,446 (100) |
|                                            | Yes         | 7 (0.5)     | 5 (0.3)     |
|                                            | Unavailable | 4 (0.3)     | 1 (0.1)     |
| History of leukemia, N (%)                 | No          | 1,554 (100) | 1,448 (100) |
|                                            | Yes         | 7 (0.5)     | 3 (0.2)     |
|                                            | Unavailable | 0 (0)       | 1 (0.1)     |
| History of lymphoma, N (%)                 | No          | 1,538 (99)  | 1,444 (100) |
|                                            | Yes         | 22 (1)      | 7 (0.5)     |
|                                            | Unavailable | 1 (0.1)     | 1 (0.1)     |
| History of metastatic cancer, N (%)        | No          | 1,537 (99)  | 1,434 (99)  |
|                                            | Yes         | 19 (1)      | 15 (1)      |
|                                            | Unavailable | 5 (0.3)     | 3 (0.2)     |

\*Time on dialysis calculated for hemodialysis and peritoneal dialysis. Of the 1,911 individual on dialysis at time of study enrollment, 716 (37%) had no time on dialysis information available.

**Supplemental Table 2: Difference for inactive time on waitlist with standard deviation**

|                                     |                                  | <b>Years (SD)</b> | <b>P-value</b> |
|-------------------------------------|----------------------------------|-------------------|----------------|
| Race                                | White                            | 1.3 (1.3)         | 0.001          |
|                                     | Black                            | 1.6 (1.4)         |                |
| <i>Socioeconomic Status</i>         |                                  |                   |                |
| Education                           | More than HS                     | 1.3 (1.2)         | <0.001         |
|                                     | Less than or equal to HS diploma | 1.6 (1.4)         |                |
| Income                              | >\$50,000 per year               | 1.3 (1.2)         | 0.01           |
|                                     | ≤\$50,000 per year               | 1.6 (1.4)         |                |
| Employment                          | Employed                         | 1.3 (1.3)         | 0.03           |
|                                     | Unemployed                       | 1.5 (1.4)         |                |
| <i>Comorbidities</i>                |                                  |                   |                |
| Obese (BMI ≥30 kg/m <sup>2</sup> )  | Not obese                        | 1.4 (1.2)         | 0.03           |
|                                     | Obese                            | 1.6 (1.4)         |                |
| Tobacco Use                         | Never smoker                     | 1.5 (1.4)         | 0.8            |
|                                     | Ever smoker                      | 1.4 (1.2)         |                |
| History of myocardial infarction    | No                               | 1.4 (1.3)         | 0.8            |
|                                     | Yes                              | 1.5 (1.3)         |                |
| History of congestive heart failure | No                               | 1.4 (1.3)         | 0.09           |
|                                     | Yes                              | 1.6 (1.3)         |                |
| Diabetes,                           | No                               | 1.3 (1.3)         | 0.003          |
|                                     | Yes                              | 1.6 (1.4)         |                |
| Diabetes with complications         | No                               | 1.4 (1.3)         | 0.09           |
|                                     | Yes                              | 1.6 (1.5)         |                |
| Peripheral vascular disease         | No                               | 1.4 (1.3)         | 0.02           |
|                                     | Yes                              | 1.8 (1.4)         |                |
| Cerebral vascular disease           | No                               | 1.5 (1.3)         | 0.7            |
|                                     | Yes                              | 1.4 (1.0)         |                |
| COPD                                | No                               | 1.4 (.3)          | 0.008          |
|                                     | Yes                              | 1.9 (1.8)         |                |
| Rheumatologic disease               | No                               | 1.4 (1.3)         | 1.0            |
|                                     | Yes                              | 1.4 (1.2)         |                |
| Peptic ulcer disease                | No                               | 1.3 (1.3)         | 0.8            |
|                                     | Yes                              | 1.5 (1.6)         |                |
| Liver disease (moderate-severe)     | No                               | 1.5 (1.3)         | 0.2            |
|                                     | Yes                              | 1.1 (1.1)         |                |
| HIV                                 | No                               | 1.4 (1.3)         | 0.8            |
|                                     | Yes                              | 1.5 (1.3)         |                |
| Dementia                            | No                               | 1.4 (1.3)         | 0.1            |
|                                     | Yes                              | 2.7 (2.3)         |                |
| History of leukemia                 | No                               | 1.4 (1.3)         | 0.8            |
|                                     | Yes                              | 1.7 (2.4)         |                |
| History of lymphoma                 | No                               | 1.3 (1.3)         | 0.006          |
|                                     | Yes                              | 2.5 (1.8)         |                |
| History of metastatic cancer        | No                               | 1.4 (1.3)         | 0.4            |
|                                     | Yes                              | 1.8 (1.7)         |                |

**Supplemental Table 3:** Sensitivity analyses testing of mediation of SES and comorbidity on listing for kidney transplant within one year between black versus white kidney failure patients or receipt of kidney transplant between black versus white kidney transplant candidates on the waitlist using inverse odds ratio weighting.

| Potential Mediator                                      | Listing for Kidney Transplant                   |                                                                  | Receipt of Kidney Transplant                     |                                                                   |
|---------------------------------------------------------|-------------------------------------------------|------------------------------------------------------------------|--------------------------------------------------|-------------------------------------------------------------------|
|                                                         | Adjusted HR (95% CI) associated with black race | Proportion of racial disparity attributed to mediator (95 % CI)† | Adjusted IRR (95% CI) associated with black race | Proportion of racial disparity attributed to mediator (95 % CI) ‡ |
| Primary Analysis                                        | 0.90 (0.83-0.97)                                | 58 (44-85)*                                                      | 0.88 (0.78-0.99)                                 | 4 (-6-68)                                                         |
| Excluding cancer and dementia                           | 0.90 (0.83-0.97)                                | 59 (46-83)*                                                      | 0.89 (0.78-1.00)                                 | 7 (-3-90)                                                         |
| Excluding University of Michigan                        | 0.91 (0.85-0.98)                                | 64 (50-90)*                                                      | 0.87 (0.78-0.97)                                 | 1 (-3-35)                                                         |
| Adjusted for dialysis modality and time on dialysis     | 0.92 (0.83-1.02)                                | 60 (42-162)*                                                     | 0.84 (0.74-0.96)                                 | 2 (-7-39)                                                         |
| Adjusted for Kidney Allocation System change on 12/4/14 | ---                                             | ---                                                              | 0.90 (0.81-1.01)                                 | 19 (3-135)                                                        |
| Adjusted for donor status                               | ---                                             | ---                                                              | 0.94 (0.84-1.05)                                 | 30 (7-314)                                                        |
| Adjusted for year of study                              | 0.89 (0.82-0.97)                                | 54 (41-79)*                                                      | 0.90 (0.80-1.01)                                 | 15 (0.1-143)                                                      |
| Multiple imputation chained analysis (MICE)             | 0.85 (0.78-0.92)                                | 42 (33-58)*                                                      | 0.89 (0.80-0.99)                                 | 11 (0-76)                                                         |
| Candidates listed in first year                         | ---                                             | ---                                                              | 0.88 (0.77-0.998)                                | 10 (-3-96)                                                        |
| Total time on waitlist                                  | ---                                             | ---                                                              | 0.87 (0.77-0.97)                                 | 2 (-7-48)                                                         |

The observed disparity (total effect) model is the association of race on outcome without accounting for individual mediator variables. The subsequent models show the residual disparity (direct effect) on the outcome after accounting for mediator(s) listed in the first column.

† Base model adjusted for age, sex, and transplant center. Receipt of kidney transplant is also adjusted for cause of ESRD and ABO status.

‡ The percent (%) attributed to the mediator estimates how much of the observed disparity acts through the mediator and was calculated by  $\{(HR-1)-(HR^*-1)\}/(HR-1)$  where HR=observed disparity and HR\*=residual disparity. Bootstrap analysis was used to derive standard errors. Mediators of statistical significance ( $p<0.05$ ) are denoted with an asterisk (\*).

**Supplemental Table 4: Stratified analysis testing mediation of SES and comorbidity on listing for kidney transplant within one year between black and white kidney failure patients using inverse odds ratio weighting.**

|                                 | ≤\$50,000 per year                                     |                                                                         | >\$50,000 per year                                     |                                                                         |
|---------------------------------|--------------------------------------------------------|-------------------------------------------------------------------------|--------------------------------------------------------|-------------------------------------------------------------------------|
|                                 | <b>Adjusted HR (95% CI) associated with black race</b> | <b>Proportion of racial disparity attributed to mediator (95 % CI)‡</b> | <b>Adjusted HR (95% CI) associated with black race</b> | <b>Proportion of racial disparity attributed to mediator (95 % CI)‡</b> |
| Observed disparity (base model) | 0.78 (0.68-0.89)                                       | ---                                                                     | 0.84 (0.76-1.01)                                       | ---                                                                     |
| SES and Comorbidity             | 0.89 (0.78-1.02)                                       | 51 (31-122)*                                                            | 0.90 (0.78-1.05)                                       | 40 (25- -390)                                                           |

The observed disparity (total effect) model is the association of race on outcome without accounting for individual mediator variables. The subsequent models show the residual disparity (direct effect) on the outcome after accounting for mediator(s) listed in the first column.

† Base model adjusted for age, sex, and transplant center.

‡ The percent (%) attributed to the mediator estimates how much of the observed disparity acts through the mediator and was calculated by  $\{(HR-1)-(HR^*-1)\}/(HR-1)$  where HR=observed disparity and HR\*=residual disparity.

Bootstrap analysis was used to derive standard errors. Mediators of statistical significance ( $p<0.05$ ) are denoted with an asterisk (\*).
